RESEARCH ARTICLE

# Protective Effects of Ferulic Acid on High Glucose-Induced Protein Glycation, Lipid Peroxidation, and Membrane Ion Pump Activity in Human Erythrocytes

Weerachat Sompong<sup>1,2</sup>, Henrique Cheng<sup>3</sup>, Sirichai Adisakwattana<sup>2,4\*</sup>

**1** Program in Clinical Biochemistry and Molecular Medicine, Department of Clinical Chemistry, Faculty of Allied Health Sciences, Chulalongkorn University, Bangkok, Thailand, **2** Research Group of Herbal Medicine for Prevention and Therapeutic of Metabolic Diseases, Chulalongkorn University, Bangkok, Thailand, **3** Department of Comparative Biomedical Sciences, School of Veterinary Medicine, Louisiana State University, Baton Rouge, Louisiana, United States of America, **4** Department of Nutrition and Dietetics, Faculty of Allied Health Sciences, Chulalongkorn University, Bangkok, Thailand

\* [sirichai.a@chula.ac.th](mailto:sirichai.a@chula.ac.th)

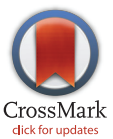

**OPEN ACCESS**

**Citation:** Sompong W, Cheng H, Adisakwattana S (2015) Protective Effects of Ferulic Acid on High Glucose-Induced Protein Glycation, Lipid Peroxidation, and Membrane Ion Pump Activity in Human Erythrocytes. *PLoS ONE* 10(6): e0129495. doi:10.1371/journal.pone.0129495

**Academic Editor:** Ram Nagaraj, University of Colorado Denver School of Medicine, UNITED STATES

**Received:** February 13, 2015

**Accepted:** May 8, 2015

**Published:** June 8, 2015

**Copyright:** This is an open access article, free of all copyright, and may be freely reproduced, distributed, transmitted, modified, built upon, or otherwise used by anyone for any lawful purpose. The work is made available under the [Creative Commons CC0](https://creativecommons.org/licenses/by/4.0/) public domain dedication.

**Data Availability Statement:** All relevant data are within the paper.

**Funding:** This work was supported by the Chula Dusadee Pipat project and The Asahi Glass Foundation. The funders had no role in study design, data collection and analysis, decision to publish, or preparation of the manuscript.

**Competing Interests:** The authors have declared that no competing interests exist.

## Abstract

Ferulic acid (FA) is the ubiquitous phytochemical phenolic derivative of cinnamic acid. Experimental studies in diabetic models demonstrate that FA possesses multiple mechanisms of action associated with anti-hyperglycemic activity. The mechanism by which FA prevents diabetes-associated vascular damages remains unknown. The aim of study was to investigate the protective effects of FA on protein glycation, lipid peroxidation, membrane ion pump activity, and phosphatidylserine exposure in high glucose-exposed human erythrocytes. Our results demonstrated that FA (10-100  $\mu$ M) significantly reduced the levels of glycated hemoglobin (HbA1c) whereas 0.1-100  $\mu$ M concentrations inhibited lipid peroxidation in erythrocytes exposed to 45 mM glucose. This was associated with increased glucose consumption. High glucose treatment also caused a significant reduction in Na<sup>+</sup>/K<sup>+</sup>-ATPase activity in the erythrocyte plasma membrane which could be reversed by FA. Furthermore, we found that FA (0.1-100  $\mu$ M) prevented high glucose-induced phosphatidylserine exposure. These findings provide insights into a novel mechanism of FA for the prevention of vascular dysfunction associated with diabetes.

## Introduction

Chronic hyperglycemia is a major factor in the onset and progress of diabetic complications. Several mechanisms linking hyperglycemia to diabetic complications include the formation of advanced glycation end-products (AGEs), polyol activation, and increased reactive oxygen species (ROS) [1]. Excessive production of ROS leads to oxidative damage and structural/functional alternations to DNA, proteins, and membrane lipids. Human erythrocytes are important for oxygen transport and elimination of carbon dioxide. Likewise, they are highly susceptible

to protein and lipid oxidation that can alter the membrane structure and function (e.g. fluidity, permeability, and enzyme activity) [2]. As an example, dysfunction of membrane ion pumps such as  $\text{Na}^+/\text{K}^+$ -ATPase pump [3] and lipid peroxidation [4] are directly linked to diabetic vascular complications. Other studies suggest that phytochemical compounds can prevent high glucose-induced erythrocyte membrane damage due to their antioxidant activity [5,6].

Ferulic acid (4-hydroxy-3-methoxycinnamic acid), a cinnamic acid derivative, belongs to a large family of biologically active substances in vegetables [7], fruits [8], and medicinal herbs [9]. Previous studies show that ferulic acid acts as a free radical scavenger such as hydroxyl and peroxy radicals [10] and an inhibitor of lipid peroxidation [11,12]. Improvement of hyperglycemia in diabetic rats was shown during ferulic acid treatment [13]. In addition, the compound decreases oxidative stress and inflammation in diabetic nephropathy [14]. A number of studies suggest that the anti-hyperglycemic effect of ferulic acid occurs by multiple mechanisms [15,16]. One such mechanism involves inhibition of  $\alpha$ -glucosidase and stimulation of insulin secretion [15,16]. Most strikingly, ferulic acid acts as a potent inhibitor of glucose-, fructose-, and ribose-induced protein glycation and oxidative damage in bovine serum albumin (BSA) [17]. Despite the available information, there are no studies examining the effect of ferulic acid on protein glycation in human erythrocytes. The objective of this study was to test whether ferulic acid can reduce protein glycation, lipid peroxidation, and phosphatidylserine exposure and increase  $\text{Na}^+/\text{K}^+$ -ATPase activity in erythrocytes under high glucose condition. The findings may provide insights into the mechanism by which ferulic acid prevents vascular and other diabetic related damages.

## Materials and Methods

### Chemicals and reagents

Ferulic acid, butylated hydroxytoluene (BHT), 2-thiobarbituric acid (TBA), malondialdehyde tetrabutylammonium salt, adenosine 5'-triphosphate disodium salt hydrate ( $\text{ATP-Na}_2$ ), ammonium molybdate, and ascorbic acid were purchased from Sigma-Aldrich Co. (St. Louis, USA). Dimethyl sulfoxide (DMSO) and Trichloroacetic acid (TCA) were obtained from Merck (Darmstadt, Germany). Glucose oxidase reagent and  $\text{HbA}_{1\text{C}}$  liquidirect reagent were purchased from HUMAN (Wiesbaden, Germany). Bio-Rad protein assay was obtained from Bio-Rad (Hercules, USA). FITC annexin V/dead cell apoptosis kit was purchased from Molecular Probes (Eugene, USA). All other chemicals and solvents were of analytical grade.

### Preparation of human erythrocytes

Whole blood samples were collected from 6 healthy volunteers ages 18–25 non-obese, non-smoker, non-alcohol consumer, and free of any medicines, drugs, or nutritional supplements. Ethylenediaminetetraacetic acid (EDTA) was used as anti-coagulant and blood samples were centrifuged at 1,000 g at 4°C for 10 min. Then, the plasma and buffy coat layers were discarded. The erythrocyte layers were washed three times with cold 150 mM NaCl and centrifuged at 1,000 g at 4°C for 10 min. The supernatants were discarded after each centrifugation. The erythrocyte layers were re-suspended in phosphate-buffered saline (PBS, pH 7.4, containing 1 mM  $\text{NaH}_2\text{PO}_4$ , 16 mM  $\text{Na}_2\text{HPO}_4$ , and 140 mM NaCl). The Ethics Review Committee for Research Involving Human Research Subjects, Health Science Group, Chulalongkorn University approved the protocol (Protocol number 055.1/55) and consent form. All subjects read and signed a written informed consent before their enrollment into the study.

### *In vitro* treatment of erythrocytes with glucose

Erythrocytes were treated with glucose according to a previous method with minor modifications [18]. The reaction mixtures contained 10% hematocrit erythrocytes and 5 or 45 mM glucose in PBS (pH 7.4) and were incubated at 37°C for 24 h in a shaking incubator. Ferulic acid at 0.1, 1, 10, and 100  $\mu$ M in 0.1% DMSO were added into the reaction mixtures containing glucose. The final concentration of 0.1% DMSO had no effect in the experiments.

After incubation, the percentages of hemolysis in the reaction mixtures were measured according to a previous method with minor modifications [19]. Briefly, the reaction mixtures were centrifuged at 1,000 g at 4°C for 10 min. The supernatants were measured at 540 nm. The percentage hemolysis was calculated by comparison to 100% hemolysis control (prepared by the incubation of 10% hematocrit erythrocytes with deionized water instead of PBS) using the equation below. The percentages of hemolysis were < 2% in each reaction mixture.

$$\% \text{ Hemolysis} = \frac{\text{Abs}_{540 \text{ nm}} \text{ in the reaction mixtures}}{\text{Abs}_{540 \text{ nm}} \text{ in 100\% hemolysis control}} \times 100$$

Before biochemical analysis, the reaction mixtures were washed three times with cold 150 mM NaCl and centrifuged at 1,000 g at 4°C for 10 min to remove the remaining glucose and ferulic acid. The supernatants were discarded after each centrifugation. Then, the erythrocyte layers were re-suspended in PBS (pH 7.4). During this process, there is some erythrocyte loss in the samples. To normalize the amount of erythrocytes, the levels of hemoglobin (Hb) was determined with Drabkin's reagent according to a previous method with minor modifications [20]. The erythrocyte samples were adjusted to the same amount of Hb before biochemical analysis.

### Measurement of protein glycation (glycated hemoglobin or HbA<sub>1c</sub>)

The levels of glycated hemoglobin or HbA<sub>1c</sub>, an Amadori product of protein glycation in hemoglobin was used as a marker and determined with HbA<sub>1c</sub> liquidirect reagent according to manufacturer's protocol. The erythrocyte samples were lysed with hemolysis reagent and incubated with latex reagent at 37°C for 5 min. The absorbance was measured at 610 nm. The levels of HbA<sub>1c</sub> were calculated from a standard curve using HbA<sub>1c</sub> and expressed as %HbA<sub>1c</sub>.

### Measurement of glucose utilization

The levels of glucose utilization were measured according to a previous method with minor modifications [21]. The concentrations of glucose were measured before and after the 24 h incubation period by glucose oxidase reagent according to manufacturer's protocol. The absorbance was measured at 505 nm. The levels of glucose utilization were calculated by subtracting glucose levels at 24 h from glucose levels at 0 h using the equation below. The result was expressed as mmol/L.

$$\text{Glucose utilization (mmol/L)} = \text{Glucose levels at 0h} - \text{Glucose levels at 24h}$$

### Measurement of lipid peroxidation

The levels of malondialdehyde (MDA) were used as a marker for lipid peroxidation using thiobarbituric acid reactive substances (TBARS) according to a previous method with minor modifications [18]. The erythrocyte samples were mixed with PBS (pH 7.4) and BHT (0.88% w/v in ethanol). Then, TCA (30% w/v) was added into the reaction mixtures and kept on ice for 2 h

and centrifuged at 2,000 g at 4°C for 15 min. The supernatants were incubated with TBA (1% w/v in 0.05 mM NaOH) and heated in a boiling water for 15 min. After cooling, the levels of TBARS were measured at 532 nm and calculated from a standard curve using malondialdehyde tetrabutylammonium salt. The results were expressed as nmol/mg Hb.

### Measurement of Na<sup>+</sup>/K<sup>+</sup>-ATPase activity

The erythrocyte membranes were prepared according to a previous method with minor modification [22]. Erythrocyte samples were lysed with Tris-HCl (15 mM, pH 7.4) and centrifuged at 12,000 g at 4°C for 30 min. The supernatants were discarded after the centrifugation. The erythrocyte membranes were washed with Tris-HCl (15 mM, pH 7.4) until the color of the membrane pellet was pale. Thereafter, deionized water was added to re-suspend the membranes. The concentration of protein was measured by Bio-Rad protein assay according to manufacturer's protocol.

The Na<sup>+</sup>/K<sup>+</sup>-ATPase activity was done according to a previous method with minor modifications [23]. The erythrocyte membranes were incubated with reaction buffer A containing 4 mM MgCl<sub>2</sub>, 3 mM ATP-Na<sub>2</sub>, and 50 mM Tris-HCl, pH 7.4, and buffer B containing 120 mM NaCl, 20 mM KCl, 4 mM MgCl<sub>2</sub>, 3 mM ATP-Na<sub>2</sub>, and 50 mM Tris-HCl, pH 7.4 at 37°C for 1 h. After the incubation, the levels of phosphate (Pi) released from ATP-Na<sub>2</sub> were measured according to a previous method with minor modifications [24]. The reaction mixture was incubated with ammonium molybdate (2.5% w/v) at room temperature for 10 min. Then, ascorbic acid (2% w/v) was added and kept at room temperature for 20 min for color development. The absorbance was measured at 725 nm. The levels of Pi release were calculated from a standard curve using KH<sub>2</sub>PO<sub>4</sub>. Na<sup>+</sup>/K<sup>+</sup>-ATPase activity was calculated using the equation below. The results were expressed as nmole Pi/mg protein/hour.

$$\text{Na}^+/\text{K}^+ - \text{ATPase activity} = P_i \text{ in the reaction buffer B} - P_i \text{ in the reaction buffer A}$$

### Measurement of phosphatidylserine exposure

The percentages of phosphatidylserine exposure on the erythrocyte membranes were measured by FITC annexin V/dead cell apoptosis kit according to manufacturer's protocol. The erythrocyte samples were suspended in annexin-binding buffer and incubated with FITC annexin V at room temperature for 15 min. After incubation, annexin-binding buffer was added and analyzed by flow cytometer at an excitation wavelength of 494 nm and emission wavelength of 518 nm. Annexin V-positive cells were identified as apoptotic cells. The results were expressed as % phosphatidylserine exposure.

### Statistical analysis

The results were expressed as mean ± standard error of mean (SEM) ( $n = 6$ ). The statistical significance was evaluated using one-way ANOVA. Tukey's HSD test was used to determine significant differences between means.  $P < 0.05$  was considered to be statistically significant.

## Results

### Effects of ferulic acid on protein glycation (glycated hemoglobin or HbA<sub>1c</sub>)

The concentration-dependent effects of glucose on Amadori product formation in erythrocytes are shown in Fig 1. After 24 h of incubation, glucose (15–45 mM) increased HbA<sub>1c</sub> levels

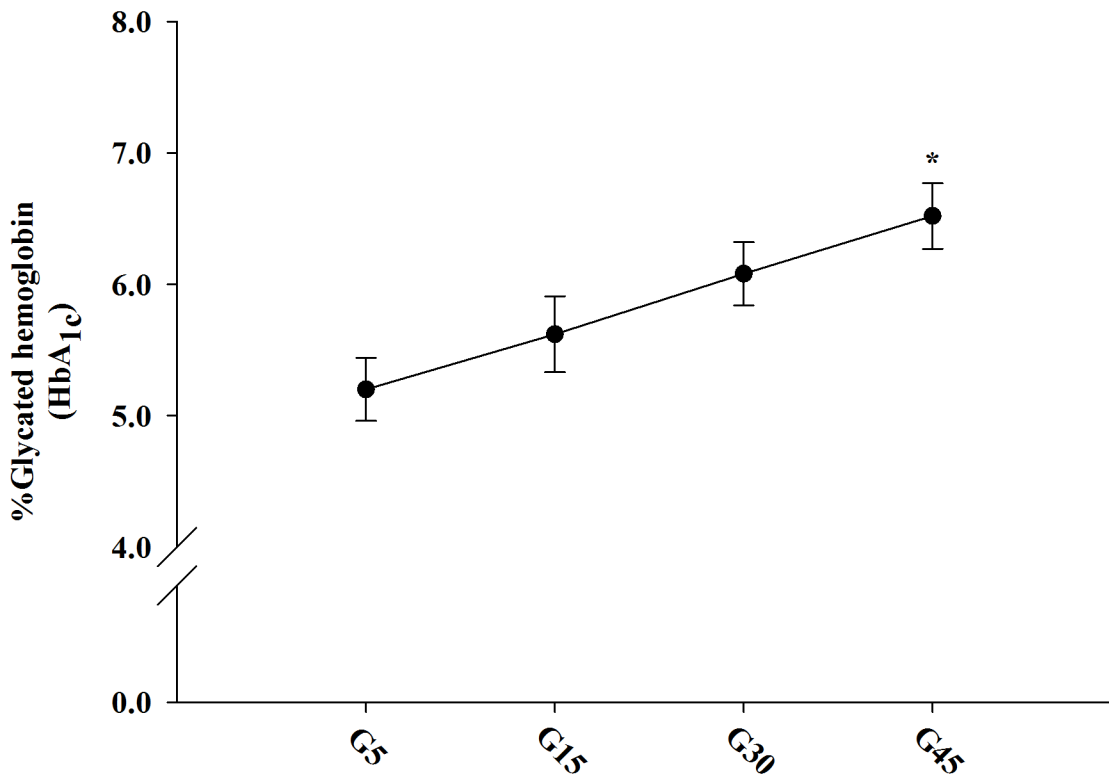

**Fig 1. The concentration-dependent effects of 5–45 mM glucose on protein glycation (glycated hemoglobin or HbA<sub>1c</sub>) in erythrocytes at 37°C for 24 h.** The results were expressed as mean±SEM ( $n = 6$ ). \* $p < 0.05$  when compared to 5 mM glucose (G5) treatment.

doi:10.1371/journal.pone.0129495.g001

ranging from 5.62–6.52%. Erythrocytes treated with high glucose (45 mM) significantly increased the levels of HbA<sub>1c</sub> compared to 5 mM glucose. Therefore, we selected the 45 mM concentration for further experiments.

The effects of ferulic acid on Amadori product in erythrocytes treated with high glucose are shown in Fig 2. The results demonstrated that the levels of HbA<sub>1c</sub> significantly increased about 1.26-fold with 45 mM glucose compared to erythrocytes treated with 5 mM glucose. This increase was significantly inhibited by addition of ferulic acid (10 and 100  $\mu$ M) about 14.84% and 15.14%, respectively. There were no differences in the levels of HbA<sub>1c</sub> from erythrocytes treated with 45 mM glucose and ferulic acid at concentrations of 0.1 and 1  $\mu$ M.

### Effects of ferulic acid on glucose utilization

In Fig 3, the effects of ferulic acid on glucose utilization in erythrocytes treated with glucose during 24 h are shown. A significant enhancement in glucose utilization was observed with 45 mM glucose compared to 5 mM glucose. Ferulic acid (0.1–100  $\mu$ M) with 45 mM glucose caused a gradual increase in glucose utilization by 16.25%, 25.06%, 32.02%, and 36.47%, respectively. It was very interesting that ferulic acid at 10 and 100  $\mu$ M concentrations significantly increased glucose utilization.

### Effects of ferulic acid on lipid peroxidation

The effects of ferulic acid on lipid peroxidation in erythrocytes treated with glucose are shown in Fig 4. The levels of lipid peroxidation with 45 mM glucose were 1.45-fold higher than with 5 mM glucose. The addition of ferulic acid (0.1–100  $\mu$ M) with 45 mM glucose significantly

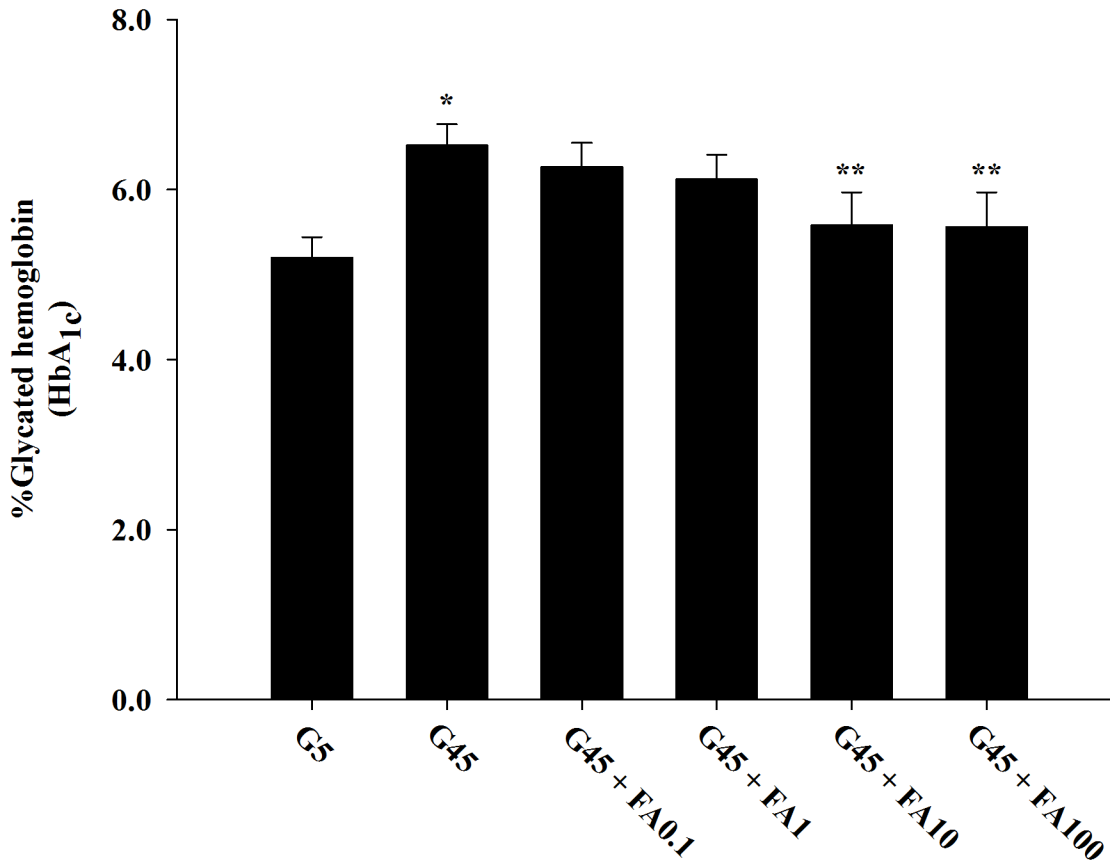

**Fig 2. The effects of ferulic acid (0.1–100 μM) on protein glycation (glycated hemoglobin or HbA<sub>1c</sub>) in erythrocytes treated with 45 mM glucose.** The results are expressed as mean±SEM (n = 6). \*p<0.05 compared to 5 mM glucose (G5) and \*\*p<0.05 compared to 45 mM glucose (G45) treatments.

doi:10.1371/journal.pone.0129495.g002

decreased lipid peroxidation (11.51%-23.50%) compared to erythrocytes treated with 45 mM glucose alone.

### Effects of ferulic acid on Na<sup>+</sup>/K<sup>+</sup>-ATPase activity

The effects of ferulic acid on Na<sup>+</sup>/K<sup>+</sup>-ATPase activity in erythrocyte treated with glucose are shown in [Table 1](#). A significant reduction in Na<sup>+</sup>/K<sup>+</sup>-ATPase activity was observed with 45 mM glucose (28.33%) compared to 5 mM glucose. The addition of 10 and 100 μM ferulic acid reversed some of the inhibitory effect of high glucose on Na<sup>+</sup>/K<sup>+</sup>-ATPase activity (14.13% and 22.81%, respectively).

### Effects of ferulic acid on phosphatidylserine exposure

The effects of ferulic acid on phosphatidylserine exposure in erythrocytes treated with glucose are shown in [Fig 5A](#) and [5B](#). A significant increase in the percentages of phosphatidylserine exposure was observed with 45 mM glucose (3.87-fold) compared to 5 mM glucose. Ferulic acid (0.1, 1, 10, and 100 μM) in erythrocytes treated with 45 mM glucose decreased phosphatidylserine exposure by 68.62%, 70.77%, 74.92%, and 80.91%, respectively, compared to 45 mM glucose alone.

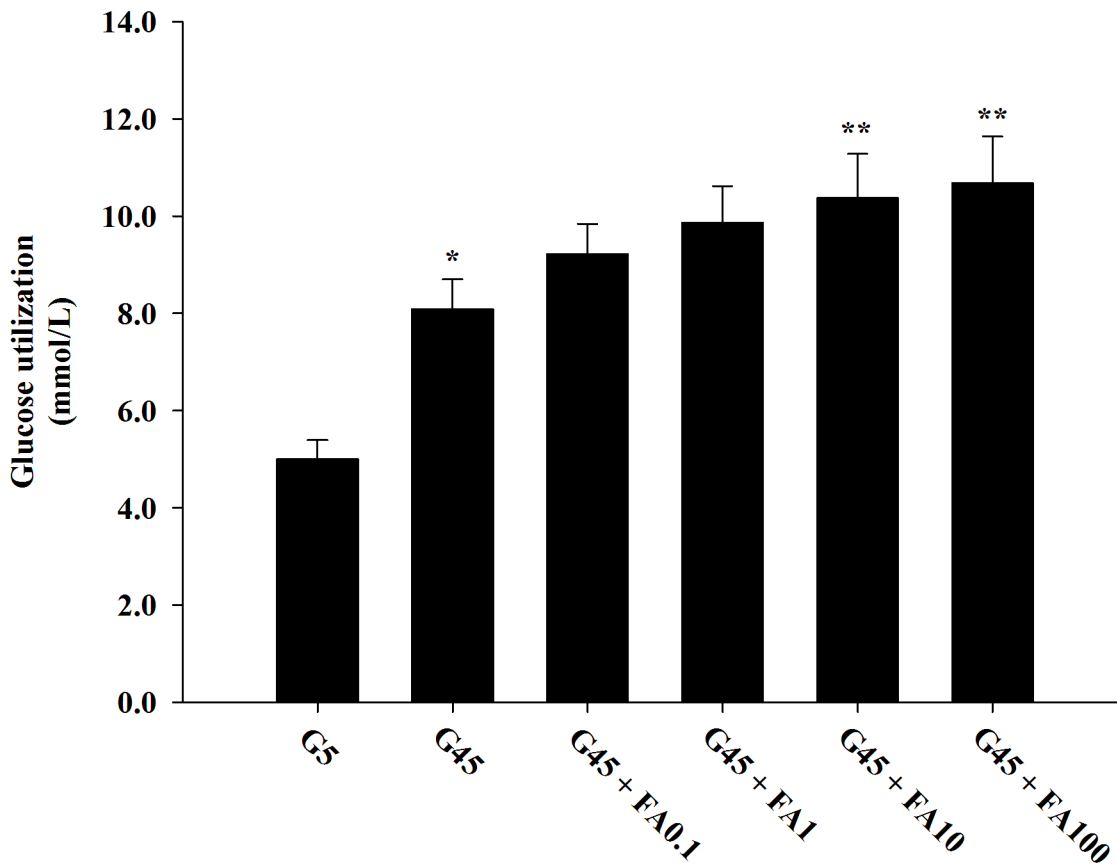

**Fig 3. The effects of ferulic acid (0.1–100  $\mu$ M) on glucose utilization in erythrocytes treated with 45 mM glucose.** The results are expressed as mean  $\pm$ SEM ( $n = 6$ ). \* $p < 0.05$  compared to 5 mM glucose (G5) and \*\* $p < 0.05$  compared to 45 mM glucose (G45) treatments.

doi:10.1371/journal.pone.0129495.g003

## Discussion

The long-term effect of chronic hyperglycemia contributes to the development of pathogenesis associated with diabetes. In erythrocytes, exposure to high glucose results in increased ROS from auto-oxidation leading to protein glycation [18]. Normally, erythrocytes uptake glucose from the extracellular fluid through glucose transporter-1 (GLUT-1), which undergoes glycolysis to produce ATP and pyruvate [25]. In the absence of mitochondria and oxidative metabolism, pyruvate is reduced to lactic acid *via* anaerobic glycolysis [26]. It is known that glucose utilization by erythrocytes can be increased during hyperglycemia [18]. Elevated extracellular glucose induces glucose toxicity and oxidative stress through auto-oxidation and formation of protein glycation [5,18]. It also increases glucose utilization and HbA<sub>1c</sub> levels [18]. In the present study, high glucose concentration was used to demonstrate its ability to induce protein glycation in a short time period, similar to other *in vitro* studies [18,21]. Interestingly, ferulic acid increased glucose utilization, thereby decreasing intracellular glucose and inhibiting HbA<sub>1c</sub> formation under high glucose condition. The precise mechanism by which ferulic acid increases glucose utilization remains unknown. Chang *et al.* reported that cinnamic acid derivatives might play an important role in the stimulation of glucose uptake to improve its utilization in C2C12 cells [27]. The current findings suggest that the increased glucose utilization by ferulic acid might be involved in the activation of glucose uptake in human erythrocytes. In the same

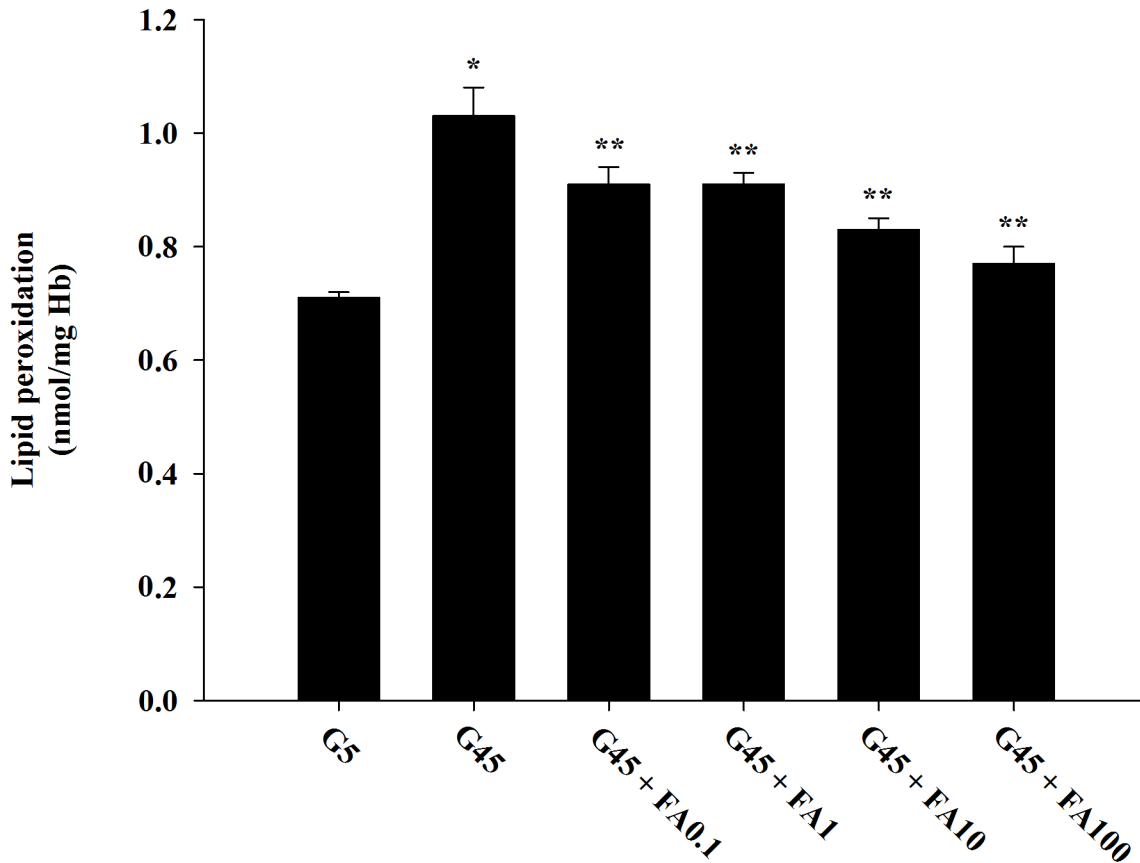

**Fig 4. The effects of ferulic acid (0.1–100  $\mu$ M) on lipid peroxidation in erythrocytes treated with 45 mM glucose.** The results are expressed as mean  $\pm$ SEM ( $n = 6$ ). \* $p < 0.05$  compared to 5 mM glucose (G5) and \*\* $p < 0.05$  compared to 45 mM glucose (G45) treatments.).

doi:10.1371/journal.pone.0129495.g004

cell type, reactive oxygen species (ROS) are produced during high glucose exposure through auto-oxidation and protein glycation [28,29]. ROS causes oxidative degradation of biological molecules especially lipid membrane resulting in cell damage [21]. Lipid peroxidation is widely used as a marker for membrane oxidative damage in other cells [5,18,28,29]. Similar findings are observed in erythrocytes treated with high glucose [5,18,28,29]. An increase in erythrocyte

**Table 1. The effects of ferulic acid (0.1–100  $\mu$ M) on Na<sup>+</sup>/K<sup>+</sup>-ATPase activity in erythrocytes treated with 45 mM glucose.**

| Treatment   | Na <sup>+</sup> /K <sup>+</sup> -ATPase activity (nmol Pi/mg protein/h) |
|-------------|-------------------------------------------------------------------------|
| G5          | 305.27 $\pm$ 5.65                                                       |
| G45         | 218.48 $\pm$ 5.77*                                                      |
| G45 + FA0.1 | 227.40 $\pm$ 6.37                                                       |
| G45 + FA1   | 235.60 $\pm$ 18.20                                                      |
| G45 + FA10  | 247.89 $\pm$ 4.69**                                                     |
| G45 + FA100 | 267.55 $\pm$ 4.37**                                                     |

The results are expressed as mean $\pm$ SEM ( $n = 6$ ). \* $p < 0.05$  compared to 5 mM glucose (G5) and \*\* $p < 0.05$  compared to 45 mM glucose (G45) treatments.

doi:10.1371/journal.pone.0129495.t001



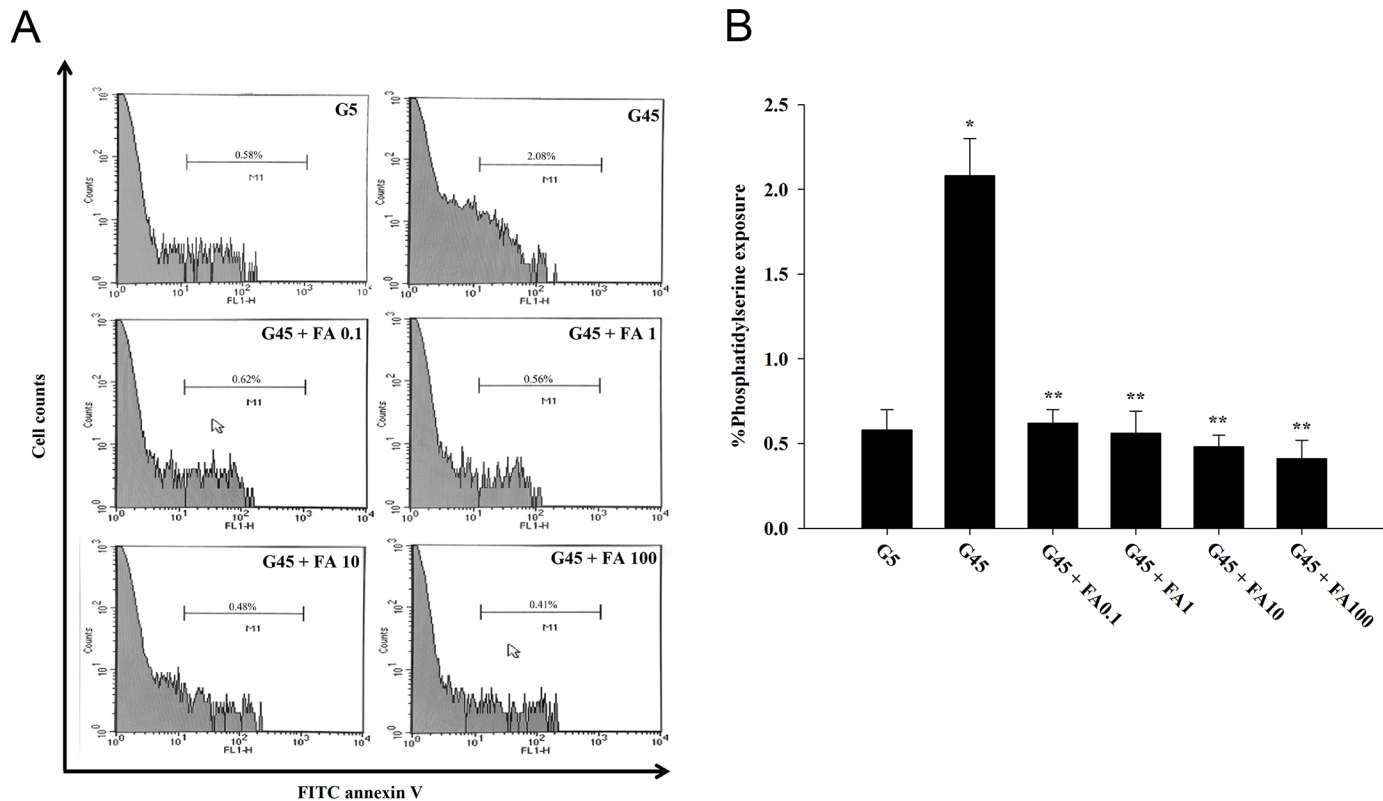

**Fig 5. The effects of ferulic acid (0.1–100  $\mu$ M) on phosphatidylserine exposure (A) and their percentages (B) in erythrocytes treated with 45 mM glucose.** The results are expressed as mean  $\pm$  SEM ( $n = 6$ ). \* $p < 0.05$  compared to 5 mM glucose (G5) and \*\* $p < 0.05$  compared to 45 mM glucose (G45) treatments.

doi:10.1371/journal.pone.0129495.g005

membrane lipid peroxidation is observed in diabetic patients [30]. Considerable interest has been given to antioxidants due to their ability to prevent protein glycation and membrane lipid peroxidation and based on our findings, ferulic acid has similar properties.

$\text{Na}^+/\text{K}^+$ -ATPase pump is an integral membrane protein that plays a major role in the regulation of  $\text{Na}^+$  and  $\text{K}^+$  gradients between extracellular and intracellular space by promoting  $\text{Na}^+$  efflux and  $\text{K}^+$  influx [31]. Therefore, inhibition of  $\text{Na}^+/\text{K}^+$ -ATPase pump can affect a number of cellular processes and function [32]. There is evidence indicating that fructose- and methylglyoxal-induced glycation causes the impairment of  $\text{Na}^+/\text{K}^+$ -ATPase activity [33]. Down-regulation of  $\text{Na}^+/\text{K}^+$ -ATPase pump is observed in streptozotocin-induced diabetic rats [34–37]. Type 1 and 2 diabetic patients often have reduced  $\text{Na}^+/\text{K}^+$ -ATPase activity [38,39]. This condition is also seen in diabetic neuropathy [40]. Our findings that erythrocytes treated with high glucose have reduced  $\text{Na}^+/\text{K}^+$ -ATPase activity is consistent with previous studies [5,18,28]. Phosphatidylserine is one of four major phospholipids located in the plasma membranes of mammalian cells. It comprises 8–15% of the total phospholipid content [41]. Normally, phosphatidylserine is present in the inner layer of the plasma membrane and facilitates protein binding at the endofacial surface [40]. In addition, it forms an important cofactor for  $\text{Na}^+/\text{K}^+$ -ATPase pump [40]. Hyperglycemia-induced oxidative stress, cell damage, and apoptosis cause the exposure of phosphatidylserine into the outer layer of the erythrocyte membrane [41]. Furthermore, erythrocytes from diabetic patients have membrane phospholipid asymmetry with increased surface exposure of phosphatidylserine [42]. This is suggested to facilitate erythrocyte adhesion to the vascular wall [43] and further contributing to thrombosis and

microcirculation impairment [44–46]. In our study, erythrocytes treated with high glucose exhibited phosphatidylserine exposure that was consistent with previous findings [47,48]. These results indicate that ferulic acid improves hyperglycemia-induced impairment of  $\text{Na}^+/\text{K}^+$ -ATPase activity and decreases the levels of phosphatidylserine exposure in erythrocytes.

In conclusion, we demonstrated that ferulic acid is capable of improving the effects of hyperglycemia on protein glycation and lipid oxidation in erythrocytes. Ferulic acid also increased glucose consumption and  $\text{Na}^+/\text{K}^+$ -ATPase activity while reducing phosphatidylserine exposure. These results provide a better understanding of the mechanism by which ferulic acid may help prevent cellular dysfunction and vascular complications associated to diabetes.

## Acknowledgments

We would like to thank Chulalongkorn University for a Ph.D. Scholarship (Weerachat Sompong) under the Chula Dusadee Pipat project. This research was supported by The Asahi Glass Foundation.

## Author Contributions

Conceived and designed the experiments: WS SA. Performed the experiments: WS. Analyzed the data: WS SA. Contributed reagents/materials/analysis tools: SA. Wrote the paper: WS SA HC.

## References

1. Giacco F, Brownlee M. Oxidative stress and diabetic complications. *Circ Res*. 2010; 107: 1058–1070. doi: [10.1161/CIRCRESAHA.110.223545](https://doi.org/10.1161/CIRCRESAHA.110.223545) PMID: [21030723](https://pubmed.ncbi.nlm.nih.gov/21030723/)
2. Hunt JV, Dean RT, Wolff SP. Hydroxyl radical production and autoxidative glycosylation. Glucose autoxidation as the cause of protein damage in the experimental glycation model of diabetes mellitus and ageing. *Biochem J*. 1988; 256: 205–212. PMID: [2851978](https://pubmed.ncbi.nlm.nih.gov/2851978/)
3. Vague P, Coste TC, Jannot MF, Raccach D, Tsimaratos M. C-peptide,  $\text{Na}^+/\text{K}^+$ -ATPase, and diabetes. *Exp Diabetes Res*. 2004; 5: 37–50. PMID: [15198370](https://pubmed.ncbi.nlm.nih.gov/15198370/)
4. Ihm SH, Yoo HJ, Park SW, Ihm J. Effect of aminoguanidine on lipid peroxidation in streptozotocin-induced diabetic rats. *Metabolism*. 1999; 48: 1141–1145. PMID: [10484054](https://pubmed.ncbi.nlm.nih.gov/10484054/)
5. Jain SK, Lim G. Lipoic acid decreases lipid peroxidation and protein glycosylation and increases ( $\text{Na}^+ + \text{K}^+$ )- and  $\text{Ca}^{++}$ -ATPase activities in high glucose-treated human erythrocytes. *Free Radic Biol Med*. 2000; 29: 1122–1128. PMID: [11121719](https://pubmed.ncbi.nlm.nih.gov/11121719/)
6. Martínez V, Ugartondo V, Vinardell MP, Torres JL, Mitjans M. Grape epicatechin conjugates prevent erythrocyte membrane protein oxidation. *J Agric Food Chem*. 2012; 60: 4090–4095. doi: [10.1021/jf2051784](https://doi.org/10.1021/jf2051784) PMID: [22480260](https://pubmed.ncbi.nlm.nih.gov/22480260/)
7. Mattila P, Hellström J. Phenolic acids in potatoes, vegetables, and some of their products. *J Food Comp Anal*. 2007; 20: 152–160.
8. Mattila P, Hellström J, Törrönen R. Phenolic acids in berries, fruits, and beverages. *J Agric Food Chem*. 2006; 54: 7193–7199. PMID: [16968082](https://pubmed.ncbi.nlm.nih.gov/16968082/)
9. Sakai S, Kawamata H, Kogure T, Mantani N, Terasawa K, Umatake M, et al. Inhibitory effect of ferulic acid and isoferulic acid on the production of macrophage inflammatory protein-2 in response to respiratory syncytial virus infection in RAW264.7 cells. *Mediators Inflamm*. 1999; 8: 173–175. PMID: [10704056](https://pubmed.ncbi.nlm.nih.gov/10704056/)
10. Kanski J, Aksenova M, Stoyanova A, Butterfield DA. Ferulic acid antioxidant protection against hydroxyl and peroxy radical oxidation in synaptosomal and neuronal cell culture systems in vitro: structure-activity studies. *J Nutr Biochem*. 2002; 13: 273–281. PMID: [12015157](https://pubmed.ncbi.nlm.nih.gov/12015157/)
11. Balasubashini MS, Rukkumani R, Viswanathan P, Menon VP. Ferulic acid alleviates lipid peroxidation in diabetic rats. *Phytother Res*. 2004; 18: 310–314. PMID: [15162367](https://pubmed.ncbi.nlm.nih.gov/15162367/)
12. Srinivasan M, Sudheer AR, Pillai KR, Kumar PR, Sudhakaran PR, Menon VP. Influence of ferulic acid on  $\gamma$ -radiation induced DNA damage, lipid peroxidation and antioxidant status in primary culture of isolated rat hepatocytes. *Toxicology*. 2006; 228: 249–258. PMID: [17049709](https://pubmed.ncbi.nlm.nih.gov/17049709/)

13. Balasubashini MS, Rukkumani R, Menon VP. Protective effects of ferulic acid on hyperlipidemic diabetic rats. *Acta Diabetol.* 2003; 40: 118–122. PMID: [14605967](#)
14. Choi R, Kim BH, Naowaboot J, Lee MY, Hyun MR, Cho EJ, et al. Effects of ferulic acid on diabetic nephropathy in a rat model of type 2 diabetes. *Exp Mol Med.* 2011; 43: 676–683. doi: [10.3858/emm.2011.43.12.078](#) PMID: [21975281](#)
15. Adisakwattana S, Chantarasinlapin P, Thammarat H, Yibchok-Anun S. A series of cinnamic acid derivatives and their inhibitory activity on intestinal  $\alpha$ -glucosidase. *J Enzyme Inhib Med Chem.* 2009; 24: 1194–1200. doi: [10.1080/14756360902779326](#) PMID: [19772492](#)
16. Adisakwattana S, Moonsan P, Yibchok-Anun S. Insulin-releasing properties of a series of cinnamic acid derivatives in vitro and in vivo. *J Agric Food Chem.* 2008; 56: 7838–7844. doi: [10.1021/jf801208t](#) PMID: [18651742](#)
17. Sompong W, Meeprom A, Cheng H, Adisakwattana S. A comparative study of ferulic acid on different monosaccharide-mediated protein glycation and oxidative damage in bovine serum albumin. *Molecules.* 2013; 18: 13886–13903. doi: [10.3390/molecules181113886](#) PMID: [24284487](#)
18. Nandhini TA, Anuradha CV. Inhibition of lipid peroxidation, protein glycation and elevation of membrane ion pump activity by taurine in RBC exposed to high glucose. *Clin Chim Acta.* 2003; 336: 129–135. PMID: [14500045](#)
19. Baumann E, Stoya G, Völkner A, Richter W, Lemke C, Linss W. Hemolysis of human erythrocytes with saponin affects the membrane structure. *Acta Histochem.* 2000; 102: 21–35. PMID: [10726162](#)
20. Walters MI. An evaluation of hemoglobin concentrations obtained with frozen altered Drabkin's reagents. *Clin Chem.* 1968; 14: 682–691. PMID: [5663464](#)
21. Jain SK, McVie R, Duett J, Herbst JJ. Erythrocyte membrane lipid peroxidation and glycosylated hemoglobin in diabetes. *Diabetes.* 1989; 38: 1539–1543. PMID: [2583378](#)
22. Malfatti CR, Burgos LT, Rieger A, Rüdger CL, Túrmina JA, Pereira RA, et al. Decreased erythrocyte  $\text{Na}^+$ ,  $\text{K}^+$ -ATPase activity and increased plasma TBARS in prehypertensive patients. *Scientific World Journal.* 2012 Aug 1. doi: [10.1100/2012/348246](#)
23. Vlachos DG, Schulpis KH, Antsaklis A, Mesogitis S, Biliatis I, Tsakiris S. Erythrocyte membrane AChE,  $\text{Na}^+$ ,  $\text{K}^+$ -ATPase and  $\text{Mg}^{2+}$  ATPase activities in mothers and their premature neonates in relation to the mode of delivery. *Scand J Clin Lab Invest.* 2010; 70: 568–574. doi: [10.3109/00365513.2010.527365](#) PMID: [20964587](#)
24. Fiske CH, Subbarow Y. The colorimetric determination of phosphorus. *J Biol Chem.* 1925; 66: 375–400.
25. Kurlbaum M, Mülek M, Högger P. Facilitated uptake of a bioactive metabolite of maritime pine bark extract (Pycnogenol) into human erythrocytes. *PloS One.* 2013 Apr 30. doi: [10.1371/journal.pone.0063197](#)
26. van Wijk R, van Solinge WW. The energy-less red blood cell is lost: erythrocyte enzyme abnormalities of glycolysis. *Blood.* 2005; 106: 4034–4042. PMID: [16051738](#)
27. Chang HK, Hsu FL, Liu IM, Cheng JT. Stimulatory effect of cinnamic acid analogues on  $\alpha_1\text{A}$ -adrenoceptors in-vitro. *J Pharm Pharmacol.* 2003; 55: 833–837. PMID: [12841945](#)
28. Jain SK, Lim G. Pyridoxine and pyridoxamine inhibits superoxide radicals and prevents lipid peroxidation, protein glycosylation, and  $(\text{Na}^+ + \text{K}^+)\text{-ATPase}$  activity reduction in high glucose-treated human erythrocytes. *Free Radic Biol Med.* 2001; 30: 232–237. PMID: [11165869](#)
29. Jain SK, Rains J, Jones K. Effect of curcumin on protein glycosylation, lipid peroxidation, and oxygen radical generation in human red blood cells exposed to high glucose levels. *Free Radic Biol Med.* 2006; 41: 92–96. PMID: [16781457](#)
30. Kesavulu MM, Giri R, Kameswara Rao B, Apparao C. Lipid peroxidation and antioxidant enzyme levels in type 2 diabetics with microvascular complications. *Diabetes Metab.* 2000; 26: 387–392. PMID: [11119018](#)
31. Horvat A, Momić T, Banjac A, Petrović S, Nikezić G, Demajo M. Selective inhibition of brain  $\text{Na,K-ATPase}$  by drugs. *Physiol Res.* 2006; 55: 325–338. PMID: [16083303](#)
32. Rajeswari P, Natarajan R, Nadler JL, Kumar D, Kalra VK. Glucose induces lipid peroxidation and inactivation of membrane-associated ion-transport enzymes in human erythrocytes in vivo and in vitro. *J Cell Physiol.* 1991; 149: 100–109. PMID: [1658008](#)
33. Derham BK, Ellory JC, Bron AJ, Harding JJ. The molecular chaperone alpha-crystallin incorporated into red cell ghosts protects membrane  $\text{Na/K-ATPase}$  against glycation and oxidative stress. *Eur J Biochem.* 2003; 270: 2605–2611. PMID: [12787026](#)
34. Djemli-Shipkolye A, Coste T, Racciah D, Vague P, Pieroni G, Gerbi A.  $\text{Na, K-atpase}$  alterations in diabetic rats: relationship with lipid metabolism and nerve physiological parameters. *Cell Mol Biol (Noisy-le-grand).* 2001; 47: 297–304. PMID: [11355004](#)

35. Di Leo MA, Santini SA, Cercone S, Lepore D, Gentiloni Silveri N, Caputo S, et al. Chronic taurine supplementation ameliorates oxidative stress and Na<sup>+</sup> K<sup>+</sup> ATPase impairment in the retina of diabetic rats. *Amino Acids*. 2002; 23: 401–406. PMID: [12436207](#)
36. Lambourne JE, Brown AM, Calcutt N, Tomlinson DR, Willars GB. Adenosine triphosphatase in nerves and ganglia of rats with streptozotocin-induced diabetes or galactosaemia; effects of aldose reductase inhibition. *Diabetologia*. 1988; 31: 379–384. PMID: [2970984](#)
37. Naka K, Sasaki H, Kishi Y, Furuta M, Sanke T, Nanjo K, et al. Effects of cilostazol on development of experimental diabetic neuropathy: functional and structural studies, and Na<sup>+</sup>-K<sup>+</sup>-ATPase activity in peripheral nerve in rats with streptozotocin-induced diabetes. *Diabetes Res Clin Pract*. 1995; 30: 153–162. PMID: [8861454](#)
38. Iwalokun BA, Iwalokun SO. Association between erythrocyte Na<sup>+</sup>K<sup>+</sup>-ATPase activity and some blood lipids in type 1 diabetic patients from Lagos, Nigeria. *BMC Endocr Disord*. 2007 Oct 1. PMID: [17953765](#)
39. Mishra N, Rizvi SI. Quercetin modulates Na<sup>+</sup>/K<sup>+</sup> ATPase and sodium hydrogen exchanger in type 2 diabetic erythrocytes. *Cell Mol Biol (Noisy-le-grand)*. 2012; 58: 148–152. PMID: [23273205](#)
40. Koc B, Erten V, Yilmaz MI, Sonmez A, Kocar IH. The relationship between red blood cell Na/K-ATPase activities and diabetic complications in patients with type 2 diabetes mellitus. *Endocrine*. 2003; 21: 273–278. PMID: [14515013](#)
41. Zwaal RF, Comfurius P, Bevers EM. Surface exposure of phosphatidylserine in pathological cells. *Cell Mol Life Sci*. 2005; 62: 971–988. PMID: [15761668](#)
42. Lupu F, Calb M, Fixman A. Alterations of phospholipid asymmetry in the membrane of spontaneously aggregated platelets in diabetes. *Thromb Res*. 1988; 50: 605–616. PMID: [3413722](#)
43. Closse C, Dachary-Prigent J, Boisseau MR. Phosphatidylserine-related adhesion of human erythrocytes to vascular endothelium. *Br J Haematol*. 1999; 107: 300–302. PMID: [10583215](#)
44. Sprague RS, Stephenson AH, Dimmitt RA, Weintraub NL, Branch CA, McMurdo L, et al. Effect of L-NAME on pressure-flow relationships in isolated rabbit lungs: role of red blood cells. *Am J Physiol*. 1995; 269: H1941–H1948. PMID: [8594902](#)
45. Sprague RS, Ellsworth ML, Stephenson AH, Lonigro AJ. ATP: the red blood cell link to NO and local control of the pulmonary circulation. *Am J Physiol*. 1996; 271: H2717–H2722. PMID: [8997335](#)
46. Pawloski JR, Hess DT, Stamler JS. Export by red blood cells of nitric oxide bioactivity. *Nature*. 2001; 409: 622–626. PMID: [11214321](#)
47. Quan GB, Liu MX, Ren SP, Zhang JG, Han Y. Changes of phosphatidylserine distribution in human red blood cells during the process of loading sugars. *Cryobiology*. 2006; 53: 107–118. PMID: [16762335](#)
48. Quan GB, Han Y, Yang C, Hu WB, Liu A, Wang JX, et al. Inhibition of high glucose-induced erythrocyte phosphatidylserine exposure by leupeptin and disaccharides. *Cryobiology*. 2008; 56: 53–61. PMID: [18093577](#)
